# Supplementary material for: The Costs of Implementing Vaccination With the RTS,S Malaria Vaccine in Five Sub-Saharan African Countries
Source: PubMed Central journal article supplement — MDM Policy Pract. 2019 Dec 19;4(2):2381468319896280. doi: 10.1177/2381468319896280 (PMC6923697; doi:10.1177/2381468319896280), 2019-12-19
Supplement: Manuscript_Supplemental_Appendix.rjf_online_supp.pdf [file Manuscript_Supplemental_Appendix.rjf_online_supp.pdf]

1 APPENDIX

2 Table A1. Institutions and health facilities where interviews were conducted

| Country                     | Central                                     | Region/Province                     | District                         | Health facility                           |
|-----------------------------|---------------------------------------------|-------------------------------------|----------------------------------|-------------------------------------------|
| Burkina Faso                | <u>DPV Central</u>                          | <u>Direction regional du centre</u> | <u>District de Boqodogo</u>      | <u>CMA sector 30 DS Boqodogo</u>          |
|                             |                                             |                                     |                                  | <u>CMU sector 15 DS Boqodogo</u>          |
|                             |                                             |                                     |                                  | <u>CSPS Dassagho</u>                      |
|                             |                                             | <u>DRS Sahel</u>                    | <u>Distric Sanitaire de Dori</u> | <u>CMU de Dori</u>                        |
|                             |                                             |                                     |                                  | <u>CSPS Seytenqa</u>                      |
|                             |                                             | Nord region                         |                                  | <u>CSPS Gandahol</u>                      |
| <u>CSPS Yatenqa</u>         |                                             |                                     |                                  |                                           |
| Ghana                       | <u>Korle Bu Accra-National</u>              | <u>Easter Region</u>                | <u>Afram Plain district</u>      | <u>Presbyterian hospital Afram Plain</u>  |
|                             |                                             | <u>Greater Accra</u>                | <u>Lekma District</u>            | <u>Lekma Hospital</u>                     |
|                             |                                             | <u>Bronq Ahafo Direc.</u>           | <u>Techiman district</u>         | <u>Holy Family hospital</u>               |
| Kenya                       | <u>Ministry of Health, Unit of vaccines</u> | Nyanza                              | Siaya                            | <u>Bondo subcounty hospital</u>           |
|                             |                                             |                                     |                                  | <u>Rabuor Health Center</u>               |
|                             |                                             |                                     |                                  | <u>Rota Dispensary Kisumu</u>             |
|                             |                                             |                                     |                                  | <u>Joo teaching and referral hospital</u> |
|                             |                                             |                                     |                                  | <u>Wagai Health Facility Siaya County</u> |
|                             |                                             |                                     | <u>Kemsa Kisumu</u>              | <u>Kisumu county hospital</u>             |
|                             |                                             |                                     |                                  | <u>Nyaqoko dispensary Siaya County</u>    |
| <u>EPI-Kisumu County</u>    | <u>Railways dispensary-Kisumu county</u>    |                                     |                                  |                                           |
| <u>Akala Health Centre</u>  |                                             |                                     |                                  |                                           |
| Mozambique                  | <u>Ministry of Health</u>                   | <u>Province of Maputo</u>           | <u>Manhiça district</u>          | <u>Manhiça District Hospital</u>          |
|                             |                                             |                                     |                                  | <u>Maragra Hospital</u>                   |
|                             |                                             |                                     |                                  | <u>Palmeira</u>                           |
|                             |                                             | <u>Province of Gaza</u>             | <u>Bilene-Macia District</u>     | <u>Malavela</u>                           |
|                             |                                             |                                     |                                  | <u>Macia District Hospital</u>            |
|                             |                                             |                                     |                                  | <u>Messano</u>                            |
| <u>Incaia</u>               |                                             |                                     |                                  |                                           |
| Tanzania                    | <u>Ministry of Health Dar Es Salaam</u>     | <u>Dar Es Salaam</u>                | <u>Kinondoni</u>                 | <u>Mwananyamala Hospital</u>              |
|                             |                                             |                                     |                                  | <u>Magomeni Health Centre</u>             |
|                             |                                             |                                     |                                  | <u>Sinza Health Centre</u>                |
|                             |                                             |                                     |                                  | <u>Kimara dispensary</u>                  |
|                             |                                             | <u>Mtwara</u>                       | <u>Tandahimba</u>                | <u>Tandahimba hospital</u>                |
|                             |                                             |                                     |                                  | <u>Kitama dispensary</u>                  |
|                             |                                             |                                     |                                  | <u>Namikupa Health Centre</u>             |
| <u>Mahuta Health Centre</u> |                                             |                                     |                                  |                                           |

3

4 Interviews took place where institutions are highlighted

5 **Table A2. Summary of the incremental quantities of resources needed at each health system level**  
6 **(per country) for the introduction of the RTS,S malaria candidate vaccine**

| Cost item                                                       | Unit               | Burkina Faso | Ghana   | Kenya  | Mozambique | Tanzania |
|-----------------------------------------------------------------|--------------------|--------------|---------|--------|------------|----------|
| <b>National level</b>                                           |                    |              |         |        |            |          |
| Cold room space                                                 | m3                 | 60           | 55      | 25     | -          | -        |
| Training                                                        | no. courses        | 3            | 5       | 2      | 2          | 2        |
| Mobilization                                                    | USD, first 2 years | 512,260      | 187,925 | 99,546 | 88,553     | 51,017   |
| Human resources                                                 | no. people         | 4            | 3       | 4      | 9          | 4        |
| <b>Intermediate level (average across regions/provinces)</b>    |                    |              |         |        |            |          |
| Cold room space                                                 | m3                 | 2            | 15      | -      | -          | -        |
| Training                                                        | no. courses        | 1            | 3.67    | -      | 2          | 2        |
| Mobilization                                                    | USD, first 2 years | 5,523        | 12,076  | -      | 8,485      | 210      |
| Human resources                                                 | no. people         | 0.5          | 0       | -      | -          | 1        |
| Other resources                                                 |                    |              |         |        |            |          |
| Vaccine carriers                                                | no.                | -            | 500     | -      | -          | -        |
| Fridges                                                         | no.                | -            | 0       | -      | -          | -        |
| Motorbikes                                                      | no.                | -            | 0       | -      | -          | -        |
| Shelves                                                         | no.                | -            | 4       | -      | -          | -        |
| Ice packs                                                       | no.                | -            | 5,400   | -      | -          | -        |
| Cold boxes                                                      | no.                | -            | 225     | -      | -          | -        |
| Car/truck                                                       | no.                | -            | -       | -      | -          | 1        |
| <b>Intermediate level (average across districts)</b>            |                    |              |         |        |            |          |
| Cold room space                                                 | m3                 | 18.7         | -       | -      | -          | -        |
|                                                                 | m2                 | 30           | 9.1     | -      | -          | -        |
| Training                                                        | no. courses        | 2            | 5.33    | 4      | 2.5        | 2        |
| Mobilization                                                    | USD, first 2 years | 3,426        | 27,569  | 53,451 | 1,181      | 350      |
| Human resources                                                 | no. people         | 1            | 0.33    | 11     | 7          | 1.5      |
| Other resources                                                 |                    |              |         |        |            |          |
| Vaccine carriers                                                | no.                | 50           | -       | -      | -          | -        |
| Fridges                                                         | no.                | 2.5          | 2       | -      | -          | -        |
| Motorbikes                                                      | no.                | 8            | -       | -      | -          | -        |
| Cold boxes                                                      | no.                | -            | -       | 10     | -          | -        |
| Cars                                                            | no.                | -            | -       | 2      | -          | -        |
| <b>Health facility level (average across health facilities)</b> |                    |              |         |        |            |          |
| Training                                                        | no. courses        | 1.4          | 2.33    | 1.67   | 3          | 2        |
| Mobilization                                                    | USD, first 2 years | 828          | 5,595   | 8,563  | 1,527      | -        |
| Human resources                                                 | no. people         | 1.4          | 0.33    | 4.33   | 1.57       | 3        |
| Other resources                                                 |                    |              |         |        |            |          |
| Vaccine carriers                                                | no.                | -            | 2.67    | -      | -          | -        |
| Cold boxes                                                      | no.                | -            | 2.33    | -      | -          | -        |
| Fridges                                                         | no.                | 1.25         | 1.33    | 0.88   | 1          | 1        |
| Motorbikes                                                      | no.                | 1.25         | 2.67    | 1.13   | 1.6        | 0.43     |
| Cars                                                            | no.                | 0            | 0.67    | 0.5    | 1.22       | 0.57     |

7 no.: number

8 Table A3. Number of infants to vaccinate from 2015 to 2025, district, region and national levels

| Level               | Name                      | 2015      | 2016      | 2017      | 2018      | 2019      | 2020      | 2021      | 2022      | 2023      | 2024      | 2025      |
|---------------------|---------------------------|-----------|-----------|-----------|-----------|-----------|-----------|-----------|-----------|-----------|-----------|-----------|
| <b>Burkina Faso</b> |                           |           |           |           |           |           |           |           |           |           |           |           |
| District            | District de Bogodogo      | 30,970    | 30,970    | 30,970    | 30,970    | 30,970    | 33,648    | 33,648    | 33,648    | 33,648    | 33,648    | 33,648    |
| District            | District Sanitaire de Dor | 14,063    | 14,063    | 14,063    | 14,063    | 14,063    | 15,279    | 15,279    | 15,279    | 15,279    | 15,279    | 15,279    |
|                     | Total districts           | 45,034    | 45,034    | 45,034    | 45,034    | 45,034    | 48,027    | 48,027    | 48,027    | 48,027    | 48,027    | 48,027    |
| Region              | Direction regional de ??  | 102,647   | 102,647   | 102,647   | 102,647   | 102,647   | 111,521   | 111,521   | 111,521   | 111,521   | 111,521   | 111,521   |
| Region              | DRS Sahel                 | 52,113    | 52,113    | 52,113    | 52,113    | 52,113    | 56,619    | 56,619    | 56,619    | 56,619    | 56,619    | 56,619    |
|                     | Total regions             | 154,760   | 154,760   | 154,760   | 154,760   | 154,760   | 168,140   | 168,140   | 168,140   | 168,140   | 168,140   | 168,140   |
| National            |                           | 742,617   | 742,617   | 742,617   | 742,617   | 742,617   | 806,820   | 806,820   | 806,820   | 806,820   | 806,820   | 806,820   |
| <b>Ghana</b>        |                           |           |           |           |           |           |           |           |           |           |           |           |
| District            | Techiman Municipal        | 7,346     | 7,346     | 7,346     | 7,346     | 7,346     | 7,492     | 7,492     | 7,492     | 7,492     | 7,492     | 7,492     |
| District            | Afram Plain Kwahu ??      | 7,750     | 7,750     | 7,750     | 7,750     | 7,750     | 7,004     | 7,004     | 7,004     | 7,004     | 7,004     | 7,004     |
| District            | Lekma district            | 8,095     | 8,095     | 8,095     | 8,095     | 8,095     | 8,255     | 8,255     | 8,255     | 8,255     | 8,255     | 8,255     |
|                     | Total districts           | 23,191    | 23,191    | 23,191    | 23,191    | 23,191    | 23,652    | 23,652    | 23,652    | 23,652    | 23,652    | 23,652    |
| Region              | Easter Region             | 93,514    | 93,514    | 93,514    | 93,514    | 93,514    | 95,370    | 95,370    | 95,370    | 95,370    | 95,370    | 95,370    |
| Region              | Greater Accra             | 142,413   | 142,413   | 142,413   | 142,413   | 142,413   | 145,239   | 145,239   | 145,239   | 145,239   | 145,239   | 145,239   |
| Region              | Brong Ahafo Direc.        | 82,072    | 82,072    | 82,072    | 82,072    | 82,072    | 83,701    | 83,701    | 83,701    | 83,701    | 83,701    | 83,701    |
|                     | Total regions             | 317,998   | 317,998   | 317,998   | 317,998   | 317,998   | 324,309   | 324,309   | 324,309   | 324,309   | 324,309   | 324,309   |
| National            |                           | 884,938   | 884,938   | 884,938   | 884,938   | 884,938   | 902,502   | 902,502   | 902,502   | 902,502   | 902,502   | 902,502   |
| <b>Kenya</b>        |                           |           |           |           |           |           |           |           |           |           |           |           |
| District            | Saya                      | 19,148    | 19,148    | 19,148    | 19,148    | 19,148    | 20,101    | 20,096    | 20,096    | 20,096    | 20,096    | 20,096    |
| District            | Kisuma                    | 23,239    | 23,239    | 23,239    | 23,239    | 23,239    | 24,396    | 24,389    | 24,389    | 24,389    | 24,389    | 24,389    |
|                     | Total districts           | 42,386    | 42,386    | 42,386    | 42,386    | 42,386    | 44,497    | 44,485    | 44,485    | 44,485    | 44,485    | 44,485    |
| National            |                           | 1,603,963 | 1,603,963 | 1,603,963 | 1,603,963 | 1,603,963 | 1,683,819 | 1,683,366 | 1,683,366 | 1,683,366 | 1,683,366 | 1,683,366 |
| <b>Mozambique</b>   |                           |           |           |           |           |           |           |           |           |           |           |           |
| District            | Manhica district          | 9,909     | 9,909     | 9,909     | 9,909     | 9,909     | 10,821    | 10,821    | 10,821    | 10,821    | 10,821    | 10,821    |
| District            | Macia Bilene district     | 6,415     | 6,415     | 6,415     | 6,415     | 6,415     | 7,004     | 7,004     | 7,004     | 7,004     | 7,004     | 7,004     |
|                     | Total districts           | 16,324    | 16,324    | 16,324    | 16,324    | 16,324    | 17,825    | 17,825    | 17,825    | 17,825    | 17,825    | 17,825    |
| National            |                           | 1,125,677 | 1,125,677 | 1,125,677 | 1,125,677 | 1,125,677 | 1,229,170 | 1,229,170 | 1,229,170 | 1,229,170 | 1,229,170 | 1,229,170 |

| Level           | Name            | 2015      | 2016      | 2017      | 2018      | 2019      | 2020      | 2021      | 2022      | 2023      | 2024      | 2025      |
|-----------------|-----------------|-----------|-----------|-----------|-----------|-----------|-----------|-----------|-----------|-----------|-----------|-----------|
| <b>Tanzania</b> |                 |           |           |           |           |           |           |           |           |           |           |           |
| District        | Kinondoni       | 72,386    | 72,386    | 72,386    | 72,386    | 72,386    | 79,419    | 79,419    | 79,419    | 79,419    | 79,419    | 79,419    |
| District        | Tandahimba      | 9,278     | 9,278     | 9,278     | 9,278     | 9,278     | 10,179    | 10,179    | 10,179    | 10,179    | 10,179    | 10,179    |
|                 | Total districts | 81,664    | 81,664    | 81,664    | 81,664    | 81,664    | 89,599    | 89,599    | 89,599    | 89,599    | 89,599    | 89,599    |
| Region          | Dar es Salaam   | 177,984   | 177,984   | 177,984   | 177,984   | 177,984   | 195,278   | 195,278   | 195,278   | 195,278   | 195,278   | 195,278   |
| Region          | Mtwara          | 51,825    | 51,825    | 51,825    | 51,825    | 51,825    | 56,860    | 56,860    | 56,860    | 56,860    | 56,860    | 56,860    |
|                 | Total regions   | 229,809   | 229,809   | 229,809   | 229,809   | 229,809   | 252,139   | 252,139   | 252,139   | 252,139   | 252,139   | 252,139   |
| National        |                 | 2,162,687 | 2,162,687 | 2,162,687 | 2,162,687 | 2,162,687 | 2,372,830 | 2,372,830 | 2,372,830 | 2,372,830 | 2,372,830 | 2,372,830 |

9 Notes: Number of births minus 1/2 infant mortality, assuming that 1/2 of infants who dies will not even receive one dose whereas those surviving will  
10 receive all doses.

11 Sources: National figures and infant mortality from United Nations, Department of Economic and Social Affairs, Population Division (2015). World  
12 Population Prospects: The 2015 Revision, DVD Editions. District and regional figures from local most recent population censuses. It is assumed that the  
13 number of births at the local level is proportionally the same as at the national level.  
14

15

16 Table A4. Minimum and maximum estimates of average cost per FVC assuming vaccine price of USD 2 or 10

| Cost item                                | Burkina Faso |               | Ghana |               | Kenya |               | Mozambique |               | Tanzania |               |  |
|------------------------------------------|--------------|---------------|-------|---------------|-------|---------------|------------|---------------|----------|---------------|--|
|                                          | USD          | % of subtotal | USD   | % of subtotal | USD   | % of subtotal | USD        | % of subtotal | USD      | % of subtotal |  |
| <b>Non-recurrent costs</b>               |              |               |       |               |       |               |            |               |          |               |  |
| Cold room/equipment                      |              |               |       |               |       |               |            |               |          |               |  |
| <i>Min</i>                               | 0,28         | 14,47         | 0,36  | 28,73         | 0,91  | 7,23          | 0,61       | 18,43         | 2,29     | 55,71         |  |
| <i>Max</i>                               | 0,29         | 14,60         | 0,40  | 18,34         | 0,91  | 6,62          | 0,64       | 17,04         | 2,75     | 51,04         |  |
| Training                                 |              |               |       |               |       |               |            |               |          |               |  |
| <i>Min</i>                               | 0,15         | 7,89          | 0,29  | 22,59         | 0,37  | 3,00          | 0,13       | 4,01          | 0,22     | 5,39          |  |
| <i>Max</i>                               | 0,16         | 8,16          | 0,90  | 41,89         | 0,86  | 6,28          | 0,17       | 4,70          | 0,32     | 5,90          |  |
| Mobilization                             |              |               |       |               |       |               |            |               |          |               |  |
| <i>Min</i>                               | 0,13         | 6,44          | 0,18  | 14,14         | 0,14  | 1,11          | 0,08       | 2,56          | 0,00     | 0,07          |  |
| <i>Max</i>                               | 0,14         | 7,23          | 0,43  | 19,67         | 0,26  | 1,85          | 0,13       | 3,41          | 0,00     | 0,07          |  |
| Human resources                          |              |               |       |               |       |               |            |               |          |               |  |
| <i>Min</i>                               | 1,73         | 90,15         | 0,58  | 46,13         | 13,78 | 109,87        | 2,92       | 87,93         | 2,57     | 62,56         |  |
| <i>Max</i>                               | 1,73         | 88,86         | 0,62  | 28,79         | 14,50 | 105,81        | 3,27       | 87,67         | 3,59     | 66,61         |  |
| Between levels adjustment (-)            |              |               |       |               |       |               |            |               |          |               |  |
| <i>Min</i>                               | 0,36         | 18,96         | 0,15  | 11,59         | 2,66  | 21,22         | 0,43       | 12,93         | 0,97     | 23,73         |  |
| <i>Max</i>                               | 0,36         | 18,84         | 0,19  | 8,68          | 2,82  | 20,56         | 0,47       | 12,82         | 1,27     | 23,62         |  |
|                                          |              |               |       |               |       |               |            |               |          |               |  |
| Sub-total                                |              |               |       |               |       |               |            |               |          |               |  |
| <i>Min</i>                               | 1,91         | 100,00        | 1,27  | 100,00        | 12,54 | 100,00        | 3,32       | 100,00        | 4,10     | 100,00        |  |
| <i>Max</i>                               | 1,95         | 100,00        | 2,15  | 100,00        | 13,71 | 100,00        | 3,73       | 100,00        | 5,39     | 100,00        |  |
| <b>Recurrent costs (vaccine related)</b> |              |               |       |               |       |               |            |               |          |               |  |
| Vaccine                                  |              |               |       |               |       |               |            |               |          |               |  |
| <i>Min</i>                               | 6,75         | 89,43         | 7,40  | 85,37         | 7,64  | 88,75         | 6,55       | 84,63         | 7,01     | 88,16         |  |
| <i>Max</i>                               | 33,8         | 89,43         | 37,0  | 85,38         | 38,18 | 88,76         | 32,74      | 84,63         | 35,06    | 88,17         |  |
| Vaccine wastage                          |              |               |       |               |       |               |            |               |          |               |  |
| <i>Min</i>                               | 0,79         | 10,56         | 1,27  | 14,62         | 0,96  | 11,23         | 1,19       | 15,36         | 0,94     | 11,83         |  |
| <i>Max</i>                               | 3,98         | 10,56         | 6,34  | 14,62         | 4,83  | 11,24         | 5,94       | 15,36         | 4,71     | 11,83         |  |
| Air freight                              |              |               |       |               |       |               |            |               |          |               |  |

|                                                                          | Burkina Faso |        | Ghana |        | Kenya |        | Mozambique |        | Tanzania |        |
|--------------------------------------------------------------------------|--------------|--------|-------|--------|-------|--------|------------|--------|----------|--------|
| <i>Min</i>                                                               | 0,001        | 0,010  | 0,001 | 0,010  | 0,001 | 0,012  | 0,001      | 0,010  | 0,001    | 0,009  |
| <i>Max</i>                                                               | 0,002        | 0,004  | 0,002 | 0,004  | 0,001 | 0,002  | 0,001      | 0,002  | 0,002    | 0,003  |
| <b>Recurrent costs (four doses at health facility)</b>                   |              |        |       |        |       |        |            |        |          |        |
| Sub-total                                                                |              |        |       |        |       |        |            |        |          |        |
| <i>Min</i>                                                               | 7,55         | 100,00 | 8,68  | 100,00 | 8,60  | 100,00 | 7,73       | 100,00 | 7,95     | 100,00 |
| <i>Max</i>                                                               | 37,7         | 100,00 | 43,39 | 100,00 | 43,01 | 100,00 | 38,68      | 100,00 | 39,77    | 100,00 |
| <b>Recurrent costs (four doses at health facility)</b>                   |              |        |       |        |       |        |            |        |          |        |
| Labor                                                                    |              |        |       |        |       |        |            |        |          |        |
| <i>Min</i>                                                               | 0,02         | 4,01   | 0,04  | 10,88  | 0,08  | 14,40  | 0,02       | 7,05   | 0,16     | 15,09  |
| <i>Max</i>                                                               | 0,24         | 10,31  | 0,25  | 10,62  | 0,09  | 7,43   | 0,17       | 5,19   | 0,23     | 19,93  |
| Supplies                                                                 |              |        |       |        |       |        |            |        |          |        |
| <i>Min</i>                                                               | 0,30         | 95,99  | 0,30  | 89,12  | 0,47  | 85,60  | 0,38       | 92,95  | 0,90     | 84,91  |
| <i>Max</i>                                                               | 2,02         | 89,69  | 2,08  | 89,38  | 1,03  | 92,57  | 3,21       | 94,81  | 0,90     | 80,07  |
| Sub-total                                                                |              |        |       |        |       |        |            |        |          |        |
| <i>Min</i>                                                               | 0,31         | 100,00 | 0,33  | 100,00 | 0,54  | 100,00 | 0,40       | 100,00 | 1,06     | 100,00 |
| <i>Max</i>                                                               | 2,23         | 100,00 | 2,33  | 100,00 | 1,12  | 100,00 | 3,38       | 100,00 | 1,12     | 100,00 |
| <b>Total cost (four doses at health facility)</b>                        |              |        |       |        |       |        |            |        |          |        |
| <i>Min</i>                                                               | 9,78         |        | 10,28 |        | 21,70 |        | 11,46      |        | 13,11    |        |
| <i>Max</i>                                                               | 41,95        |        | 47,87 |        | 57,83 |        | 45,80      |        | 46,27    |        |
| <b>Recurrent costs (three doses at health facility, one as outreach)</b> |              |        |       |        |       |        |            |        |          |        |
| Labor                                                                    |              |        |       |        |       |        |            |        |          |        |
| <i>Min</i>                                                               | 0,07         | 16,83  | 0,18  | 23,64  | 0,14  | 22,69  | 0,25       | 33,22  |          |        |
| <i>Max</i>                                                               | 0,97         | 28,58  | 0,74  | 19,22  | 0,23  | 17,73  | 0,38       | 11,29  |          |        |
| Supplies                                                                 |              |        |       |        |       |        |            |        |          |        |
| <i>Min</i>                                                               | 0,03         | 7,23   | 0,30  | 39,12  | 0,47  | 76,44  | 0,38       | 51,65  |          |        |
| <i>Max</i>                                                               | 0,40         | 11,72  | 2,08  | 54,04  | 1,03  | 81,41  | 2,84       | 85,03  |          |        |
| Fuel                                                                     |              |        |       |        |       |        |            |        |          |        |
| <i>Min</i>                                                               | 0,30         | 75,94  | 0,29  | 37,24  | 0,01  | 0,87   | 0,11       | 15,14  |          |        |
| <i>Max</i>                                                               | 2,03         | 59,71  | 1,04  | 26,74  | 0,01  | 0,86   | 0,12       | 3,68   |          |        |

|                                                                     | Burkina Faso |        | Ghana |        | Kenya |        | Mozambique |        | Tanzania |  |
|---------------------------------------------------------------------|--------------|--------|-------|--------|-------|--------|------------|--------|----------|--|
| Sub-total                                                           |              |        |       |        |       |        |            |        |          |  |
| <i>Min</i>                                                          | 0,40         | 100,00 | 0,76  | 100,00 | 0,61  | 100,00 | 0,73       | 100,00 |          |  |
| <i>Max</i>                                                          | 3,38         | 100,00 | 3,86  | 100,00 | 1,27  | 100,00 | 3,34       | 100,00 |          |  |
| <b>Total cost (three doses at health facility, one as outreach)</b> |              |        |       |        |       |        |            |        |          |  |
| <i>Min</i>                                                          | 9,87         |        | 10,71 |        | 7,64  |        | 11,79      |        |          |  |
| <i>Max</i>                                                          | 43,08        |        | 49,40 |        | 38,18 |        | 45,75      |        |          |  |

17

18

**Table A5. Estimated time for reconstruction and administration of 1 dose needle-administered vaccine and for outreach delivery**

|              | Average personnel time for reconstruction and administration 1 dose at the health facility level (minutes)* | Average commuting time for outreach delivery at the health facility level (minutes)** |
|--------------|-------------------------------------------------------------------------------------------------------------|---------------------------------------------------------------------------------------|
| Burkina Faso | 1.53                                                                                                        | 60.22                                                                                 |
| Ghana        | 3.59                                                                                                        | 120                                                                                   |
| Kenya        | 2.00                                                                                                        | 57.5                                                                                  |
| Mozambique   | 4.40                                                                                                        | 85                                                                                    |
| Tanzania     | 4.38                                                                                                        | NA                                                                                    |

\*This estimate was done across self reported time needed for vaccine reconstruction and administration of 1 dose across health facilities per each vaccine similar to RTS,S, that is needle administered vaccines (e.g., polio oral vaccine was not included). Average time per vaccine was, then averaged across the vaccines considered (number and type of vaccines was different across country – e.g., yellow fever was not considered in Mozambique as the country is not endemic, but it was for Burkina Faso).

\*\*This estimate reflects the scenario in which the fourth dose is delivered in an outreach manner. These average values were calculated across health facility for each vaccine type. As for administration time, average time per vaccine was, then averaged across the vaccines considered. The reported time taken to reach the communities (and back) was then divided by an average speed of cars/motorbikes (assumed as 60km/hour), divided by the number of km per liter of gasoline and multiplied by cost of a liter of gasoline.

# Questionnaire for representatives of the Expanded Programme on Immunization

## Cost of implementation of malaria vaccination programmes in five select sub-Saharan African countries

(Burkina Faso, Ghana, Kenya, Mozambique, Tanzania)

Country, specify: \_\_\_\_\_

Level of interview (Ministry of Health, district, province, health facility, etc), specify:

\_\_\_\_\_

Where relevant provide your feedback specifically in the light of the level that is applying to your role and responsibility as per above information

Questionnaire #(for level specified above): \_\_\_\_\_

### MONITORING, EVALUATION AND QUALITY CONTROL OF EPI

1

Name the systems of monitoring, evaluation and quality control of EPI

HIGH

- a. \_\_\_\_\_
- b. \_\_\_\_\_
- c. \_\_\_\_\_

### VACCINES PROCUREMENT AND GENERAL INFORMATION

2

In the last 3 years, detail the formulation of each vaccine in EPI and your supplier/producers

HIGH

| Vaccine   | Formulation | Producer |
|-----------|-------------|----------|
| YF        |             |          |
| BCG       |             |          |
| OPV       |             |          |
| Measles   |             |          |
| VitaminA  |             |          |
| Rotavirus |             |          |
| Td        |             |          |

|             |  |  |
|-------------|--|--|
| MR          |  |  |
| DtwPHibHepB |  |  |
| Pneumo_conj |  |  |

**Please, verify whether EPI schedule provided applies to your country:**

**YF=Yellow fever vaccine; BCG=Bacille Calmette-Guérin vaccine; OPV=Oral polio vaccine; Measles=Measles vaccine; VitaminA=Vitamin A supplementation; TT=Tetanus toxoid; Pneumo\_conj=Pneumococcal conjugate vaccine; DtwPHibHepB=Diphtheria and Tetanus and Pertussis and Haemophilus influenzae and Hepatitis B; IPV=Inactivated polio vaccine; Rotavirus=Rotavirus vaccine; HPV=Human Papillomavirus vaccine**

| <b>Country<br/>(cross the countries that are not applicable)</b> | <b>Antigens</b>               | <b>Schedules</b>                                   | <b>Provide information in this column if deviating from information in previous column</b> | <b>Comments</b> |
|------------------------------------------------------------------|-------------------------------|----------------------------------------------------|--------------------------------------------------------------------------------------------|-----------------|
| Burkina Faso                                                     | YF                            | 9 months;                                          |                                                                                            |                 |
|                                                                  | BCG                           | birth;                                             |                                                                                            |                 |
|                                                                  | OPV                           | birth; 8, 12, 16 weeks;                            |                                                                                            |                 |
|                                                                  | Measles                       | 9 months;                                          |                                                                                            |                 |
|                                                                  | TT                            | 1st contact pregnancy; +1 month; +1, +2, +3 years; |                                                                                            |                 |
|                                                                  | Pneumo_conj                   | 8, 12, 16 weeks;                                   |                                                                                            |                 |
|                                                                  | DtwPHibHep B                  | 8, 12, 16 weeks;                                   |                                                                                            |                 |
| Ghana                                                            | Rotavirus                     | 8, 12, 16 weeks;                                   |                                                                                            |                 |
|                                                                  | YF                            | 9 months;                                          |                                                                                            |                 |
|                                                                  | BCG                           | birth;                                             |                                                                                            |                 |
|                                                                  | OPV                           | birth; 6, 10, 14 weeks;                            |                                                                                            |                 |
|                                                                  | Measles                       | 9, 18 months;                                      |                                                                                            |                 |
| VitaminA                                                         | 6, 12, 18, 24, 30, 36 months; |                                                    |                                                                                            |                 |

|            |                 |                                                                |  |  |
|------------|-----------------|----------------------------------------------------------------|--|--|
|            | Rotavirus       | 6, 10 weeks;                                                   |  |  |
|            | Td              | 1st contact;<br>+1, +6<br>months; +1<br>year;                  |  |  |
|            | MR              | 9 months;                                                      |  |  |
|            | DTwPHibHep<br>B | 6, 10, 14<br>weeks;                                            |  |  |
|            | Pneumo_conj     | 6, 10, 14<br>weeks;                                            |  |  |
| Kenya      | YF              | 9 months;                                                      |  |  |
|            | BCG             | birth;                                                         |  |  |
|            | OPV             | 6, 10, 14<br>weeks;                                            |  |  |
|            | Measles         | 9 months;                                                      |  |  |
|            | VitaminA        | 6-11, 12-59<br>months;                                         |  |  |
|            | TT              | 1st contact<br>pregnancy;<br>+1, +6<br>months; +1,<br>+1 year; |  |  |
|            | Pneumo_conj     | 6, 10, 14<br>weeks;                                            |  |  |
|            | DTwPHibHep<br>B | 6,10,14<br>weeks;                                              |  |  |
|            | IPV             |                                                                |  |  |
|            | Rotavirus       |                                                                |  |  |
|            | HPV             |                                                                |  |  |
| Mozambique | BCG             | birth;                                                         |  |  |
|            | OPV             | 6, 10, 14<br>weeks;                                            |  |  |
|            | Measles         | 9 months;                                                      |  |  |
|            | VitaminA        | 6, 12, 18, 24,<br>30, 36<br>months;                            |  |  |
|            | TT              | 1st contact;<br>+1, +6                                         |  |  |

|          |                 |                                                   |  |  |
|----------|-----------------|---------------------------------------------------|--|--|
|          |                 | months; +1,<br>+1 year;                           |  |  |
|          | Pneumo_conj     | 6, 10, 14<br>weeks;                               |  |  |
|          | DTwPHibHep<br>B | 6, 10, 14<br>weeks;                               |  |  |
|          | HPV             | 10 years;                                         |  |  |
| Tanzania | BCG             | birth;                                            |  |  |
|          | OPV             | Birth; 6, 10,<br>14 weeks;                        |  |  |
|          | Measles         | 9 months;                                         |  |  |
|          | TT              | 1st contact;<br>+1, +6<br>months; +1,<br>+1 year; |  |  |
|          | Pneumo_conj     | 6, 10, 14<br>weeks;                               |  |  |
|          | DTwPHibHep<br>B | 6, 10, 14<br>week;                                |  |  |
|          | Rotavirus       | , 10 weeks;                                       |  |  |

**In the last 3 years, what was the average frequency in supplying each vaccine?**

**YF:** |\_|\_|\_|\_| a year      **BCG:** |\_|\_|\_|\_| a year      **OPV:** |\_|\_|\_|\_| a year

**Measles:** |\_|\_|\_|\_| a year      **Vitamin A:** |\_|\_|\_|\_| a year      **TT:** |\_|\_|\_|\_| a year

**Pneumo conj:** |\_|\_|\_|\_| a year      **DTwPHibHepB:** |\_|\_|\_|\_| a year

**HPV:** |\_|\_|\_|\_| a year      **Rotavirus:** |\_|\_|\_|\_| a year

**Can you estimate the mean rate of vaccine wastage (all causes including e.g. expiry, rupture of cold chain) at all levels based on experience with current EPI programmes? Can you also provide a minimum and a maximum? Consider all level, from central up to local or only the level you are responsible for .**

Central level: |\_|\_|\_|\_|%      min |\_|\_|\_|\_|%      max |\_|\_|\_|\_|%



|                    |       |            |            |
|--------------------|-------|------------|------------|
| <b>YF</b>          | _ _ % | min  _ _ % | max  _ _ % |
| <b>BCG</b>         | _ _ % | min  _ _ % | max  _ _ % |
| <b>OPV</b>         | _ _ % | min  _ _ % | max  _ _ % |
| <b>Measles</b>     | _ _ % | min  _ _ % | max  _ _ % |
| <b>Vitamin A</b>   | _ _ % | min  _ _ % | max  _ _ % |
| <b>TT</b>          | _ _ % | min  _ _ % | max  _ _ % |
| <b>Pneumo conj</b> | _ _ % | min  _ _ % | max  _ _ % |
| <b>HPV</b>         | _ _ % | min  _ _ % | max  _ _ % |
| <b>DTwPHibHepB</b> | _ _ % | min  _ _ % | max  _ _ % |
| <b>Rotavirus</b>   | _ _ % | min  _ _ % | max  _ _ % |

**4 How many doses of each vaccine on average entered and many were distributed to the lower level (HIGH, MEDIUM) last year?**

**YF:** IN |\_|\_|\_|\_|\_|\_|\_|\_|\_|\_| OUT|\_|\_|\_|\_|\_|\_|\_|\_|\_|\_|

If IN ≠ OUT please specify reason

---

**BCG:** IN |\_|\_|\_|\_|\_|\_|\_|\_|\_|\_| OUT|\_|\_|\_|\_|\_|\_|\_|\_|\_|\_|

If IN ≠ OUT please specify reason

---

**OPV:** IN |\_|\_|\_|\_|\_|\_|\_|\_|\_|\_| OUT|\_|\_|\_|\_|\_|\_|\_|\_|\_|\_|

If IN  $\neq$  OUT please specify reason

---

**Measles:** IN |\_|\_|\_|\_|\_|\_|\_|\_|\_|\_| OUT|\_|\_|\_|\_|\_|\_|\_|\_|\_|\_|

If IN  $\neq$  OUT please specify reason

---

**Vit A:** IN |\_|\_|\_|\_|\_|\_|\_|\_|\_|\_| OUT|\_|\_|\_|\_|\_|\_|\_|\_|\_|\_|

If IN  $\neq$  OUT please specify reason

---

**TT:** IN |\_|\_|\_|\_|\_|\_|\_|\_|\_|\_| OUT|\_|\_|\_|\_|\_|\_|\_|\_|\_|\_|

If IN  $\neq$  OUT please specify reason

---

**Pneumo conj:** IN |\_|\_|\_|\_|\_|\_|\_|\_|\_|\_| OUT|\_|\_|\_|\_|\_|\_|\_|\_|\_|\_|

If IN  $\neq$  OUT please specify reason

---

**HPV:** IN |\_|\_|\_|\_|\_|\_|\_|\_|\_|\_| OUT|\_|\_|\_|\_|\_|\_|\_|\_|\_|\_|

If IN  $\neq$  OUT please specify reason

---

**DtwPHibHepB:** IN |\_|\_|\_|\_|\_|\_|\_|\_|\_|\_| OUT|\_|\_|\_|\_|\_|\_|\_|\_|\_|\_|

If IN  $\neq$  OUT please specify reason

---

**Rotavirus:** IN |\_|\_|\_|\_|\_|\_|\_|\_|\_|\_| OUT|\_|\_|\_|\_|\_|\_|\_|\_|\_|\_|

If IN  $\neq$  OUT please specify reason

---



Other \_\_\_\_\_

8 Which is the annual costs of running such a surveillance system (or can you estimate how much it may cost each year?)

cost|\_|\_|\_|\_|\_|\_|\_|\_|\_|\_|\_|\_|\_|\_| currency\_\_\_\_\_

min|\_|\_|\_|\_|\_|\_|\_|\_|\_|\_|\_|\_|\_|\_| max|\_|\_|\_|\_|\_|\_|\_|\_|\_|\_|\_|\_|\_|\_|

## CUSTOM CLEARANCE

Concerning the air freight (including insurance), what is the cost or tariff per m<sup>3</sup>?

|\_|\_|\_|\_| local currency/m<sup>3</sup>

**What is the freight volume?**

Small scale: |\_|\_|\_|\_| liters

Medium scale: |\_|\_|\_|\_| liters

Large scale: |\_|\_|\_|\_| liters

**What is the number of freights a year?**

Small scale: |\_|\_|\_|\_| freights

Medium scale: |\_|\_|\_|\_| freights

Large scale: |\_|\_|\_|\_| freights

**What is the number of freights a year?**

Small scale: |\_|\_|\_|\_| freights

Medium scale: |\_\_|\_\_|\_\_| freights

Large scale: |\_\_|\_\_|\_\_| freights

**What is the average transit time?**

|\_\_|\_\_|\_\_| hours

## COLD CHAIN STORAGE

**What is the tariff per m<sup>3</sup> a month?**

|\_\_|\_\_|\_\_| local currency

**What is the storage volume?**

Small scale: |\_\_|\_\_|\_\_| liters

Medium scale: |\_\_|\_\_|\_\_| liters

Large scale: |\_\_|\_\_|\_\_| liters

**What are on the average the months of storage a year?**

Small scale: |\_\_|\_\_|\_\_| months

Medium scale: |\_\_|\_\_|\_\_| months

Large scale: |\_\_|\_\_|\_\_| months

## SUPPLY CHAIN MANAGEMENT

**Where is your central storage located?**

\_\_\_\_\_

9 Please describe in-bound logistics (check all that applies):

HIGH

a. How is the central storage equipped?

- With trucks from the airport and number |\_\_|\_\_|;
- With trucks from the port and number ;
- Every month, otherwise Every \_\_\_\_\_

What is your current capacity of the central/intermediate storage system?

HIGH/MEDIUM

- b. Effective storage volume (m<sup>3</sup>) \_\_\_\_\_ Tariff/m3 |\_\_|\_\_|
- c. yearly average utilized capacity (%) \_\_\_\_\_
- d. inventory turnover rate \_\_\_\_\_
- e. OR average duration a batch of vaccines remains in the central warehouse (days) \_\_\_\_\_

10 How many personnel work at the central/intermediate storage, by role, and how many EPI vaccines stored/handled on the average? HIGH/MEDIUM

- |            |              |                       |
|------------|--------------|-----------------------|
| Role _____ | Number _____ | Annual salary _____ # |
| vaccines__ |              |                       |
| Role _____ | Number _____ | Annual salary _____ # |
| vaccines__ |              |                       |
| Role _____ | Number _____ | Annual salary _____ # |
| vaccines__ |              |                       |
| Role _____ | Number _____ | Annual salary _____ # |
| vaccines__ |              |                       |

11 Other costs (annual) at the central/intermediate storage

HIGH/MEDIUM

- Electricity \_\_\_\_\_ currency \_\_\_\_\_
- Rent \_\_\_\_\_ currency \_\_\_\_\_
- Maintenance \_\_\_\_\_ currency \_\_\_\_\_
- Other \_\_\_\_\_ currency \_\_\_\_\_
- Other \_\_\_\_\_ currency \_\_\_\_\_

12 **Would the storage system nationally or at your level be ready to accommodate an incremental vaccine with no additional resources?**

**HIGH/MEDIUM**

- Yes, the estimated space capacity is \_\_\_\_\_ m<sup>3</sup>
- No, because \_\_\_\_\_

13 **If no, please detail the additional resources needed**

Personnel :

|            |              |
|------------|--------------|
| Role _____ | Number _____ |

Durable goods:

- More space M<sup>2</sup> \_\_\_\_\_
- More cold room space M<sup>3</sup> \_\_\_\_\_
- Other \_\_\_\_\_ Quantity \_\_\_\_\_
- Other \_\_\_\_\_ Quantity \_\_\_\_\_

14 **How often does the distribution of vaccines from central/intermediate storage to the other country levels take place?**

**HIGH/MEDIUM**

- weekly
- monthly
- Other, specify: \_\_\_\_\_

15 **What kind of rule regulates vaccine distribution?**

**HIGH/MEDIUM**

- push (distribution happens based on predetermined rules and not depending on request from lower levels of the system)
- pull (distribution happens upon request from lower levels of the system)
- Other \_\_\_\_\_

16 **How does distribution to the lower levels take place?**

**HIGH/MEDIUM**

- Through transportation (mean of transportation owned by the government) directly organized by the government
- Transportation and distribution out-sourced to private companies
- Other \_\_\_\_\_

**What is your current capacity of the transportation system organized by the government? HIGH/MEDIUM**

How many trucks/cars? |\_|\_|\_|\_|

Number of cold boxes |\_|\_|\_|\_|

Effective transportation volume capacity (m<sup>3</sup>) |\_|\_|\_|\_|

17 **Which are on average (min, max) the annual transportation costs for vaccine distribution? HIGH/MEDIUM**

Personnel |\_|\_|\_|\_|\_|\_|\_|\_|\_| currency\_\_\_\_

min|\_|\_|\_|\_|\_|\_|\_|\_|\_| max|\_|\_|\_|\_|\_|\_|\_|\_|\_|

Fuel |\_|\_|\_|\_|\_|\_|\_|\_|\_| currency\_\_\_\_

min|\_|\_|\_|\_|\_|\_|\_|\_|\_| max|\_|\_|\_|\_|\_|\_|\_|\_|\_|

Maintenance |\_|\_|\_|\_|\_|\_|\_|\_|\_| currency\_\_\_\_

min|\_|\_|\_|\_|\_|\_|\_|\_|\_| max|\_|\_|\_|\_|\_|\_|\_|\_|\_|

Other \_\_\_\_\_ |\_|\_|\_|\_|\_|\_|\_|\_|\_|

currency\_\_\_\_ min|\_|\_|\_|\_|\_|\_|\_|\_|\_| max|\_|\_|\_|\_|\_|\_|\_|\_|\_|

**What is the approximate distance between this storage place and the next level?**

**HIGH/MEDIUM**

Average |\_|\_|\_|\_|kilometers min |\_|\_|% max |\_|\_|%

**What is the availability of cold boxes?**

Average number |\_|\_|\_|\_| cold boxes    min |\_|\_|\_|\_|    max |\_|\_|\_|\_|

**What is the estimated capacity of a cold box?**

Average |\_|\_|\_|\_| liters    min |\_|\_|\_|    max |\_|\_|\_|

**Actors involved in supply chain and roles (public/partnership public-private/private/non-governmental organizations)**

**HIGH/MEDIUM**

Public \_\_\_\_\_

Roles \_\_\_\_\_

Partnership public-private \_\_\_\_\_ Roles \_\_\_\_\_

NGOs \_\_\_\_\_ Roles \_\_\_\_\_

**HUMAN RESOURCES AT EPI FACILITY (VACCINE ADMINISTRATION)**

**How many employees at this level = Health facility delivering EPI?per type of role (managers, nurse, etc.)?**

- How many managers? |\_|\_|\_|\_|\_|
- How many nurses? |\_|\_|\_|\_|\_|
- How many physicians? |\_|\_|\_|\_|\_|
- Other \_\_\_\_\_ |\_|\_|\_|\_|\_|
- Other \_\_\_\_\_ |\_|\_|\_|\_|\_|
- Other \_\_\_\_\_ |\_|\_|\_|\_|\_|

**How many additional employees (roles and average salaries per role) would be needed for the introduction of the new vaccine?**

- How many additional managers? |\_|\_|\_| (EPI) |\_|\_|\_| (outside EPI)  
yearly salary |\_|\_|\_|\_|\_|\_|\_| currency \_\_\_\_\_
- How many additional nurses? |\_|\_|\_| yearly salary |\_|\_|\_|\_|\_|\_|\_|  
currency \_\_\_\_\_
- How many additional physicians? |\_|\_|\_| yearly salary |\_|\_|\_|\_|\_|\_|\_|  
currency \_\_\_\_\_
- Other \_\_\_\_\_ |\_|\_|\_| yearly salary |\_|\_|\_|\_|\_|\_|\_|  
currency \_\_\_\_\_
- Other \_\_\_\_\_ |\_|\_|\_| yearly salary |\_|\_|\_|\_|\_|\_|\_|  
currency \_\_\_\_\_
- Other \_\_\_\_\_ |\_|\_|\_| yearly salary |\_|\_|\_|\_|\_|\_|\_|  
currency \_\_\_\_\_

**TRAINING**

**How many training courses organized in the last 3 years for EPI nationally or at your level) and for how many days each course on the average (min, max)?** **ALL**

Courses |\_|\_|\_|\_|  
Number of days |\_|\_|\_|\_| min |\_|\_|\_|\_| max |\_|\_|\_|\_|

**Number of participants (and roles), resources used and costs typically in conjunction with the introduction of a new vaccine** **ALL**

- |\_|\_|\_|\_| trainers; average cost per diems |\_|\_|\_|\_|\_|\_|\_| currency \_\_\_\_\_  
min |\_|\_|\_|\_|\_|\_|\_| max |\_|\_|\_|\_|\_|\_|\_|
- |\_|\_|\_|\_| organizers; average cost per diems |\_|\_|\_|\_|\_|\_|\_| min |\_|\_|\_|\_|\_|\_|\_|  
max |\_|\_|\_|\_|\_|\_|\_| currency \_\_\_\_\_

- |\_|\_|\_|\_| attendants ; average hotel cost |\_|\_|\_|\_|\_|\_|\_|\_| currency \_\_\_\_\_  
min |\_|\_|\_|\_|\_|\_|\_|\_| max |\_|\_|\_|\_|\_|\_|\_|\_|
- Average travel cost |\_|\_|\_|\_|\_|\_|\_|\_| currency \_\_\_\_\_  
min |\_|\_|\_|\_|\_|\_|\_|\_| max |\_|\_|\_|\_|\_|\_|\_|\_|
- Average cost refreshment |\_|\_|\_|\_|\_|\_|\_|\_| currency \_\_\_\_\_  
min |\_|\_|\_|\_|\_|\_|\_|\_| max |\_|\_|\_|\_|\_|\_|\_|\_|
- Average cost training material |\_|\_|\_|\_|\_|\_|\_|\_| currency \_\_\_\_\_  
min |\_|\_|\_|\_|\_|\_|\_|\_| max |\_|\_|\_|\_|\_|\_|\_|\_|
- Average cost stationary |\_|\_|\_|\_|\_|\_|\_|\_| currency \_\_\_\_\_  
min |\_|\_|\_|\_|\_|\_|\_|\_| max |\_|\_|\_|\_|\_|\_|\_|\_|
- Average cost other, specify: \_\_\_\_\_ |\_|\_|\_|\_|\_|\_|\_|\_|  
currency \_\_\_\_\_  
min |\_|\_|\_|\_|\_|\_|\_|\_| max |\_|\_|\_|\_|\_|\_|\_|\_|
- Average cost other \_\_\_\_\_ |\_|\_|\_|\_|\_|\_|\_|\_| currency \_\_\_\_\_  
min |\_|\_|\_|\_|\_|\_|\_|\_| max |\_|\_|\_|\_|\_|\_|\_|\_|

**How many additional training courses at this level would be needed for the introduction of a new vaccine (during the first 2 years of introduction)?**

**ALL**

Additional courses |\_|\_|\_|\_|\_|

**SPECIFIC TO HEALTH FACILITIES (LOW LEVEL)**

**What are your current capital resources:**

- How many refrigerators? |\_|\_|\_|\_| spare capacity: |\_|\_|\_|\_|  
(# doses)
- Total capacity |\_|\_|\_|\_| m<sup>3</sup>
- How many vehicles used for EPI?
  - Cars |\_|\_|\_|\_| spare capacity: |\_|\_|\_|\_| (# doses) costs/car: |\_|\_|\_|\_|
  - Motorbikes |\_|\_|\_|\_| spare capacity: |\_|\_|\_|\_| (# doses) costs/bike: |\_|\_|\_|\_|

**Which and how many new capital resources would be needed for the introduction of a new vaccine?**

- How many additional refrigerators?                   |\_|\_|\_|
- Total additional capacity                               |\_|\_|\_|m<sup>3</sup>
- How many additional vehicles used for EPI?
  - Cars           |\_|\_|\_|
  - Motorbikes |\_|\_|\_|

**What is the number of doses supplied and delivered of each vaccine last year (2014)?**

| Vaccine      | Doses supplied | Doses delivered | Main reasons why doses supplied < doses delivered |
|--------------|----------------|-----------------|---------------------------------------------------|
| YF           |                |                 |                                                   |
| BCG          |                |                 |                                                   |
| OPV          |                |                 |                                                   |
| Measles      |                |                 |                                                   |
| VitaminA     |                |                 |                                                   |
| Rotavirus    |                |                 |                                                   |
| Td           |                |                 |                                                   |
| MR           |                |                 |                                                   |
| DTwPHibHep B |                |                 |                                                   |
| Pneumo_conj  |                |                 |                                                   |

**What is the approximate total catchment population of your health facility (including adults and children) if applying to your situation?**

|\_|\_|\_|\_| infants   |\_|\_|\_|\_| children   |\_|\_|\_|\_| adults

**How many personnel work at the immunization department in your health facility?**

Role \_\_\_\_\_ Number \_\_\_\_\_ Annual salary \_\_\_\_\_

**Would the health facility be ready to accommodate an incremental vaccine with no additional resources?**

Yes  No

If yes, what is the estimated spare capacity in terms of # doses? |\_|\_|\_|\_|\_|\_|

**18 If no, what is the estimated additional resourcing needed?**

Personnel :

Role \_\_\_\_\_ Number \_\_\_\_\_ (EPI) Number \_\_\_\_\_ (outside EPI)

Role \_\_\_\_\_ Number \_\_\_\_\_ (EPI) Number \_\_\_\_\_ (outside EPI)

Role \_\_\_\_\_ Number \_\_\_\_\_ (EPI) Number \_\_\_\_\_ (outside EPI)

Role \_\_\_\_\_ Number \_\_\_\_\_ (EPI) Number \_\_\_\_\_ (outside EPI)

Role \_\_\_\_\_ Number \_\_\_\_\_ (EPI) Number \_\_\_\_\_ (outside EPI)

Durable goods:

More refrigeration space M<sup>3</sup> \_\_\_\_\_

Other \_\_\_\_\_ Quantity \_\_\_\_\_

Other \_\_\_\_\_ Quantity \_\_\_\_\_

**Can you please state which are the modalities of delivering vaccination for each type of vaccine (whether outreach or at the health facility or which percentage is outreach and which is at the health facility)?**

| Vaccine  | Modality                               |
|----------|----------------------------------------|
| YF       | Outreach _____% Health facility _____% |
| BCG      | Outreach _____% Health facility _____% |
| OPV      | Outreach _____% Health facility _____% |
| Measles  | Outreach _____% Health facility _____% |
| VitaminA | Outreach _____% Health facility _____% |

|              |                                        |
|--------------|----------------------------------------|
| Rotavirus    | Outreach _____% Health facility _____% |
| Td           | Outreach _____% Health facility _____% |
| MR           | Outreach _____% Health facility _____% |
| DTwPHibHep B | Outreach _____% Health facility _____% |
| Pneumo_conj  | Outreach _____% Health facility _____% |

**19 Resources used and costs associated with the administration of 1 dose including reconstitution at the health facility**

| Vaccine | Resources                                                                                                                                                                                                                                                                                |
|---------|------------------------------------------------------------------------------------------------------------------------------------------------------------------------------------------------------------------------------------------------------------------------------------------|
| YF      | Personnel: Health personnel involved _____<br>_____<br>Minutes of administration _____ min% _____ max% _____<br>Number of Syringes used _____ Costs _____ Wastage ____%<br>Number syringes/cold box _____ Costs _____<br>Other materials used, specify _____ Costs 1 _____ Costs 2 _____ |
| BCG     | Personnel: Health personnel involved _____<br>_____<br>Minutes of administration _____ min% _____ max% _____<br>Number of Syringes used _____ Costs _____ Wastage ____%<br>Number syringes/cold box _____ Costs _____<br>Other materials used, specify _____ Costs 1 _____ Costs 2 _____ |
| OPV     | Personnel: Health personnel involved _____<br>_____<br>Minutes of administration _____ min% _____ max% _____<br>Number of Syringes used _____ Costs _____ Wastage ____%<br>Number syringes/cold box _____ Costs _____<br>Other materials used, specify _____ Costs 1 _____ Costs 2 _____ |
| Measles | Personnel: Health personnel involved _____<br>_____<br>Minutes of administration _____ min% _____ max% _____                                                                                                                                                                             |

|              |                                                                                                                                                                                                                                                                                      |
|--------------|--------------------------------------------------------------------------------------------------------------------------------------------------------------------------------------------------------------------------------------------------------------------------------------|
|              | Number of Syringes used _____ Costs _____ Wastage ___%<br>Number syringes/cold box _____ Costs _____<br>Other materials used, specify _____ Costs 1 _____ Costs 2<br>_____                                                                                                           |
| VitaminA     | Personnel: Health personnel involved<br>_____<br>Minutes of administration _____ min% _____ max% _____<br>Number of Syringes used _____ Costs _____ Wastage ___%<br>Number syringes/cold box _____ Costs _____<br>Other materials used, specify _____ Costs 1 _____ Costs 2<br>_____ |
| Rotavirus    | Personnel: Health personnel involved<br>_____<br>Minutes of administration _____ min% _____ max% _____<br>Number of Syringes used _____ Costs _____ Wastage ___%<br>Number syringes/cold box _____ Costs _____<br>Other materials used, specify _____ Costs 1 _____ Costs 2<br>_____ |
| Td           | Personnel: Health personnel involved<br>_____<br>Minutes of administration _____ min% _____ max% _____<br>Number of Syringes used _____ Costs _____ Wastage ___%<br>Number syringes/cold box _____ Costs _____<br>Other materials used, specify _____ Costs 1 _____ Costs 2<br>_____ |
| MR           | Personnel: Health personnel involved<br>_____<br>Minutes of administration _____ min% _____ max% _____<br>Number of Syringes used _____ Costs _____ Wastage ___%<br>Number syringes/cold box _____ Costs _____<br>Other materials used, specify _____ Costs 1 _____ Costs 2<br>_____ |
| DTwPHibHep B | Personnel: Health personnel involved<br>_____<br>_____                                                                                                                                                                                                                               |

|             |                                                                                                                                                                                                                                                                                          |
|-------------|------------------------------------------------------------------------------------------------------------------------------------------------------------------------------------------------------------------------------------------------------------------------------------------|
|             | Minutes of administration _____ min% _____ max% _____<br>Number of Syringes used _____ Costs _____ Wastage ____%<br>Number syringes/cold box _____ Costs _____<br>Other materials used, specify _____ Costs 1 _____ Costs 2 _____                                                        |
| Pneumo_conj | Personnel: Health personnel involved _____<br>_____<br>Minutes of administration _____ min% _____ max% _____<br>Number of Syringes used _____ Costs _____ Wastage ____%<br>Number syringes/cold box _____ Costs _____<br>Other materials used, specify _____ Costs 1 _____ Costs 2 _____ |

**20 Resources used and costs associated with the administration of 1 dose outreach including reconstitution**

| Vaccine | Resources                                                                                                                                                                                                                                                                        |
|---------|----------------------------------------------------------------------------------------------------------------------------------------------------------------------------------------------------------------------------------------------------------------------------------|
| YF      | Personnel: Health personnel involved _____<br>_____<br>Minutes of administration _____ min% _____ max% _____<br>Number of Syringes used _____ Costs _____<br>Other material used, specify: _____ Costs 1 _____ Costs 2 _____<br>Average commute time _____ Min% _____ max% _____ |
| BCG     | Personnel: Health personnel involved _____<br>_____<br>Minutes of administration _____ min% _____ max% _____<br>Number of Syringes used _____ Costs _____<br>Other material used, specify: _____ Costs 1 _____ Costs 2 _____<br>Average commute time _____ Min% _____ max% _____ |
| OPV     | Personnel: Health personnel involved _____<br>_____                                                                                                                                                                                                                              |

|           |                                                                                                                                                                                                                                                                                                             |
|-----------|-------------------------------------------------------------------------------------------------------------------------------------------------------------------------------------------------------------------------------------------------------------------------------------------------------------|
|           | <p>Minutes of administration _____ min% _____ max% _____</p> <p>Number of Syringes used _____ Costs _____</p> <p>Other material used, specify: _____ Costs 1 _____ Costs 2 _____</p> <p>Average commute time _____ Min% _____ max% _____</p>                                                                |
| Measles   | <p>Personnel: Health personnel involved _____</p> <p>_____</p> <p>Minutes of administration _____ min% _____ max% _____</p> <p>Number of Syringes used _____ Costs _____</p> <p>Other material used, specify: _____ Costs 1 _____ Costs 2 _____</p> <p>Average commute time _____ Min% _____ max% _____</p> |
| VitaminA  | <p>Personnel: Health personnel involved _____</p> <p>_____</p> <p>Minutes of administration _____ min% _____ max% _____</p> <p>Number of Syringes used _____ Costs _____</p> <p>Other material used, specify: _____ Costs 1 _____ Costs 2 _____</p> <p>Average commute time _____ Min% _____ max% _____</p> |
| Rotavirus | <p>Personnel: Health personnel involved _____</p> <p>_____</p> <p>Minutes of administration _____ min% _____ max% _____</p> <p>Number of Syringes used _____ Costs _____</p> <p>Other material used, specify: _____ Costs 1 _____ Costs 2 _____</p> <p>Average commute time _____ Min% _____ max% _____</p> |
| Td        | <p>Personnel: Health personnel involved _____</p> <p>_____</p> <p>Minutes of administration _____ min% _____ max% _____</p> <p>Number of Syringes used _____ Costs _____</p> <p>Other material used, specify: _____ Costs 1 _____ Costs 2 _____</p>                                                         |

|              |                                                                                                                                                                                                                                                                                     |
|--------------|-------------------------------------------------------------------------------------------------------------------------------------------------------------------------------------------------------------------------------------------------------------------------------------|
|              | Average commute time _____ Min% _____ max% _____                                                                                                                                                                                                                                    |
| MR           | Personnel: Health personnel involved<br>_____<br>_____<br>Minutes of administration _____ min% _____ max% _____<br>Number of Syringes used _____ Costs _____<br>Other material used, specify: _____ Costs 1 _____ Costs 2 _____<br>Average commute time _____ Min% _____ max% _____ |
| DTwPHibHep B | Personnel: Health personnel involved<br>_____<br>_____<br>Minutes of administration _____ min% _____ max% _____<br>Number of Syringes used _____ Costs _____<br>Other material used, specify: _____ Costs 1 _____ Costs 2 _____<br>Average commute time _____ Min% _____ max% _____ |
| Pneumo_conj  | Personnel: Health personnel involved<br>_____<br>_____<br>Minutes of administration _____ min% _____ max% _____<br>Number of Syringes used _____ Costs _____<br>Other material used, specify: _____ Costs 1 _____ Costs 2 _____<br>Average commute time _____ Min% _____ max% _____ |

STROBE Statement—Checklist

**The costs of implementing vaccination with the RTS,S malaria vaccine in five sub-Saharan African countries**

**Item  
No**

**Recommendation**

**Where**

|                           |    |                                                                                                                                                                                      |                                                   |
|---------------------------|----|--------------------------------------------------------------------------------------------------------------------------------------------------------------------------------------|---------------------------------------------------|
| <b>Title and abstract</b> | 1  | (a) Indicate the study's design with a commonly used term in the title or the abstract                                                                                               | Abstract - Methods                                |
|                           |    | (b) Provide in the abstract an informative and balanced summary of what was done and what was found                                                                                  | Abstract - Results/Conclusion                     |
| <b>Introduction</b>       |    |                                                                                                                                                                                      |                                                   |
| Background/rationale      | 2  | Explain the scientific background and rationale for the investigation being reported                                                                                                 | Introduction - 4 first paragraphs                 |
| Objectives                | 3  | State specific objectives, including any prespecified hypotheses                                                                                                                     | Introduction - last paragraph                     |
| <b>Methods</b>            |    |                                                                                                                                                                                      |                                                   |
| Study design              | 4  | Present key elements of study design early in the paper                                                                                                                              | Detailed in methods                               |
| Setting                   | 5  | Describe the setting, locations, and relevant dates, including periods of recruitment, exposure, follow-up, and data collection                                                      | Methods - data collection                         |
| Participants              | 6  | (a) Give the eligibility criteria, and the sources and methods of selection of participants                                                                                          | Methods - data collection ; Perspective and scope |
| Variables                 | 7  | Clearly define all outcomes, exposures, predictors, potential confounders, and effect modifiers. Give diagnostic criteria, if applicable                                             | Methods - Cost components                         |
| Data sources/ measurement | 8* | For each variable of interest, give sources of data and details of methods of assessment (measurement). Describe comparability of assessment methods if there is more than one group | Methods - Data collection; Cost components        |
| Bias                      | 9  | Describe any efforts to address potential sources of bias                                                                                                                            | Discussion                                        |
| Study size                | 10 | Explain how the study size was arrived at                                                                                                                                            | Methods - data collection                         |
| Quantitative variables    | 11 | Explain how quantitative variables were handled in the analyses. If applicable, describe which groupings were chosen and why                                                         | Methods                                           |
| Statistical methods       | 12 | (a) Describe all statistical methods, including those used to control for confounding                                                                                                | NA                                                |
|                           |    | (b) Describe any methods used to examine subgroups and interactions                                                                                                                  | NA                                                |
|                           |    | (c) Explain how missing data were addressed                                                                                                                                          | NA                                                |
|                           |    | (d) If applicable, describe analytical methods taking account of sampling strategy                                                                                                   | NA                                                |

(e) Describe any sensitivity analyses

| <b>Results</b>    |     |                                                                                                                                                                                                              |                                        |
|-------------------|-----|--------------------------------------------------------------------------------------------------------------------------------------------------------------------------------------------------------------|----------------------------------------|
| Participants      | 13* | (a) Report numbers of individuals at each stage of study—eg numbers potentially eligible, examined for eligibility, confirmed eligible, included in the study, completing follow-up, and analysed            | NA (cost study)                        |
|                   |     | (b) Give reasons for non-participation at each stage                                                                                                                                                         | NA (cost study)                        |
|                   |     | (c) Consider use of a flow diagram                                                                                                                                                                           | NA (cost study)                        |
| Descriptive data  | 14* | (a) Give characteristics of study participants (eg demographic, clinical, social) and information on exposures and potential confounders                                                                     | NA (cost study)                        |
|                   |     | (b) Indicate number of participants with missing data for each variable of interest                                                                                                                          | NA (cost study)                        |
| Outcome data      | 15* | Report numbers of outcome events or summary measures                                                                                                                                                         | Results                                |
| Main results      | 16  | (a) Give unadjusted estimates and, if applicable, confounder-adjusted estimates and their precision (eg, 95% confidence interval). Make clear which confounders were adjusted for and why they were included | Results                                |
|                   |     | (b) Report category boundaries when continuous variables were categorized                                                                                                                                    | Results                                |
|                   |     | (c) If relevant, consider translating estimates of relative risk into absolute risk for a meaningful time period                                                                                             | Results                                |
| Other analyses    | 17  | Report other analyses done—eg analyses of subgroups and interactions, and sensitivity analyses                                                                                                               | NA                                     |
| <b>Discussion</b> |     |                                                                                                                                                                                                              |                                        |
| Key results       | 18  | Summarise key results with reference to study objectives                                                                                                                                                     | Discussion                             |
| Limitations       | 19  | Discuss limitations of the study, taking into account sources of potential bias or imprecision. Discuss both direction and magnitude of any potential bias                                                   | Discussion - 8 <sup>th</sup> paragraph |
| Interpretation    | 20  | Give a cautious overall interpretation of results considering objectives, limitations, multiplicity of analyses, results from similar studies, and other relevant evidence                                   | Discussion                             |

|                  |    |                                                                       |            |
|------------------|----|-----------------------------------------------------------------------|------------|
| Generalisability | 21 | Discuss the generalisability (external validity) of the study results | Discussion |
|------------------|----|-----------------------------------------------------------------------|------------|

---

**Other information**

|         |    |                                                                                                                                                               |                                      |
|---------|----|---------------------------------------------------------------------------------------------------------------------------------------------------------------|--------------------------------------|
| Funding | 22 | Give the source of funding and the role of the funders for the present study and, if applicable, for the original study on which the present article is based | Declaration of Conflicting Interests |
|---------|----|---------------------------------------------------------------------------------------------------------------------------------------------------------------|--------------------------------------|

---

\*Give information separately for exposed and unexposed groups.

**Note:** An Explanation and Elaboration article discusses each checklist item and gives methodological background and published examples of transparent reporting. The STROBE checklist is best used in conjunction with this article (freely available on the Web sites of PLoS Medicine at <http://www.plosmedicine.org/>, Annals of Internal Medicine at <http://www.annals.org/>, and Epidemiology at <http://www.epidem.com/>). Information on the STROBE Initiative is available at [www.strobe-statement.org](http://www.strobe-statement.org).

FOR PEER-REVIEW
